# Supplementary material for: How steady are steady-state mountain belts? – a re-examination of the Olympic Mountains (Washington State, USA)
Source: Copernicus journal article supplement (doi:10.5194/esurf-2018-65), 2018-09-03
Supplement: Supplementary file 1 [file esurf-2018-65-supplement.zip]

Archive with 5 entries (5 files):
- supplement_text.pdf
- table_S1_apatites_He.xlsx
- table_S2_zircons_He.xlsx
- table_S3_AFT_single.docx
- table_S4_ZFT_single.docx
