# Supplementary material for: How steady are steady-state mountain belts? – a re-examination of the Olympic Mountains (Washington State, USA)
Source: Copernicus journal article supplement (doi:10.5194/esurf-2018-65), 2018-09-03
Supplement: Supplementary file 1 [file esurf-2018-65-supplement.zip › table_S1_apatites_He.xlsx]

## Sheet: Status_21-Nov-2016.csv
Table DR 1: Apatite (U-Th-Sm)/He data
Notes: Aliquots which are strike-through are not considered for the sample age calculation.For two samples (OP1572 and OP1576) a single grain age (aliquot is red) is taken as sample age. ppm values of U, Th and Sm are calculated from iCAP results by deviding the mass of the respective element by the grain mass (which is derived from measurements of 43Ca). eU is calculated by adding U-content and …
Sample/ Aliquot	U (ppm)	U ± 2SD (pg)			Th (ppm)	Th ± 2SD (pg)			Sm (ppm)	Sm ± 2SD (pg)			He ± 1SD (mol)			grain mass (µg)	eU (ppm)	Th/U	Uncorrected grain age (Ma)	FT correction	Corrected grain age ± 1SD (Ma)
Ap_OP1550-1	27.0999	130.835	±	18.4787	23.9857	115.8	±	3.17251	147.42	711.725	±	10.7243	1.66238e-15	±	3.13762e-17	4.82787	32.7365	0.907938	1.97532	0.797492	2.47722	±	0.320252
Ap_OP1550-2	13.8399	56.6358	±	10.9178	9.79757	40.0936	±	1.28953	165.598	677.659	±	10.8047	4.91527e-16	±	1.14915e-17	4.0922	16.1424	0.726198	1.40799	0.789442	1.77605	±	0.33607
Ap_OP1550-3	17.7818	38.8422	±	9.86522	11.4925	25.1039	±	1.0438	35.5086	77.5644	±	8.19746	1.79547e-16	±	7.31246e-18	2.18438	20.4825	0.662992	0.774492	0.697427	1.11235	±	0.281989
Ap_OP1550-4	69.5546	117.951	±	16.0375	50.1703	85.0794	±	2.45696	100.357	170.186	±	8.61573	1.35964e-15	±	2.1886e-17	1.69581	81.3446	0.739931	1.83826	0.622565	2.96216	±	0.37563
Ap_OP1551-1	159.055	728.321	±	20.6937	124.856	571.722	±	8.79524	74.1256	339.424	±	7.32995	1.20304e-14	±	1.65446e-16	4.57905	188.396	0.805254	2.58122	0.763449	3.38258	±	0.198584
Ap_OP1551-2	55.8735	130.731	±	3.12313	112.325	262.815	±	6.39708	113.958	266.636	±	7.01646	2.85597e-15	±	4.08187e-17	2.33978	82.2698	2.06224	2.74302	0.69718	3.93959	±	0.211658
Ap_OP1551-3	13.5161	10.0497	±	0.747592	36.8455	27.3958	±	1.05311	68.0558	50.6017	±	3.49818	1.41249e-16	±	6.14899e-18	0.743533	22.1748	2.79643	1.59028	0.657396	2.41022	±	0.197571
Ap_OP1551-4	45.9	71.2091	±	2.49186	68.3882	106.097	±	3.40717	193.434	300.092	±	8.45132	1.19148e-15	±	1.71584e-17	1.5514	61.9712	1.52841	2.29796	0.647493	3.54434	±	0.210603
Ap_OP1552-1	2.66962	19.7524	±	1.14428	4.37905	32.4003	±	1.05785	114.268	845.458	±	13.1829	4.48151e-16	±	1.10242e-17	7.39893	3.6987	1.68268	3.03427	0.810242	3.7466	±	0.260068
Ap_OP1552-2	56.6962	127.762	±	4.80792	64.3607	145.034	±	3.89317	508.184	1145.17	±	13.6681	2.46357e-14	±	2.90038e-16	2.25346	71.8209	1.16449	28.1433	0.694196	40.5658	±	2.34994
Ap_OP1552-3	2.59509	10.6114	±	0.442881	5.1792	21.1778	±	1.03103	100.136	409.456	±	5.97406	2.2359e-16	±	7.61097e-18	4.08901	3.8122	2.04729	2.65557	0.739513	3.58091	±	0.254954
Ap_OP1552-4	79.2329	201.905	±	5.94641	53.58	136.535	±	3.41098	227.171	578.89	±	8.0227	3.30564e-15	±	3.98096e-17	2.54825	91.8242	0.693694	2.6201	0.707002	3.71921	±	0.200478
Ap_OP1553-1	13.6931	46.1967	±	5.97291	12.927	43.6122	±	1.17782	86.3567	291.344	±	9.88567	2.12593e-16	±	8.73099e-18	3.37373	16.7309	0.968428	0.702305	0.704704	0.994127	±	0.121088
Ap_OP1553-2	80.4759	225.827	±	19.7915	45.4613	127.571	±	2.61815	143.926	403.878	±	8.98678	3.59057e-15	±	4.28183e-17	2.80615	91.1593	0.579491	2.61282	0.733387	3.55943	±	0.328256
Ap_OP1553-3	5.25976	70.934	±	13.0332	6.17208	83.2378	±	2.12941	85.2553	1149.77	±	12.9191	8.08331e-16	±	1.13226e-17	13.4862	6.7102	1.20375	1.68115	0.831437	2.01991	±	0.316472
Ap_OP1553-4	6.22987	43.6995	±	8.5893	6.58521	46.192	±	1.51927	183.963	1290.41	±	13.7093	9.20382e-14	±	1.0263e-15	7.01451	7.7774	1.08433	312.243	0.778762	399.048	±	67.7244
Ap_OP1553-5	5.5413	25.1582	±	1.08677	8.01531	36.3906	±	0.972685	128.847	584.982	±	7.86295	6.77264e-16	±	1.56744e-17	4.54013	7.4249	1.48381	3.71939	0.731506	5.08358	±	0.316264
Ap_OP1554-1	22.4247	79.9356	±	11.5771	14.5903	52.0088	±	1.22444	77.4716	276.157	±	8.32859	8.21032e-16	±	1.46819e-17	3.56462	25.8534	0.667432	1.67275	0.783806	2.13497	±	0.292943
Ap_OP1554-2	35.304	72.0428	±	9.09633	35.2768	71.9873	±	1.45269	97.6317	199.231	±	6.81299	5.63538e-16	±	1.17025e-17	2.04064	43.594	1.02503	1.18733	0.652198	1.81508	±	0.208665
Ap_OP1554-3	35.5495	43.3	±	8.42189	9.35747	11.3976	±	0.56031	86.8966	105.842	±	7.74397	1.20395e-16	±	7.08691e-18	1.21802	37.7485	0.27002	0.504784	0.625963	0.805751	±	0.173878
Ap_OP1554-4	52.6859	106.449	±	12.2473	18.8797	38.1453	±	1.14924	104.615	211.367	±	9.14524	1.18415e-15	±	2.31086e-17	2.02044	57.1226	0.367597	1.9278	0.63893	3.01644	±	0.359826
Ap_OP1555-1	10.3632	39.965	±	7.76322	4.70523	18.1455	±	0.693211	196.343	757.186	±	9.78949	2.48087e-14	±	2.62685e-16	3.85644	11.4689	0.465756	106.459	0.737221	143.537	±	25.5702
Ap_OP1555-2	19.0147	37.9468	±	5.1401	19.5306	38.9764	±	1.38336	119.434	238.348	±	8.4763	2.23168e-16	±	5.87173e-18	1.99565	23.6044	1.05365	0.883697	0.676988	1.30485	±	0.160141
Ap_OP1555-3	79.9983	263.567	±	21.8551	7.94478	26.1754	±	0.684281	154.552	509.196	±	11.2326	2.93043e-15	±	3.69077e-17	3.29466	81.8653	0.101876	2.02333	0.763134	2.66686	±	0.243764
Ap_OP1555-4	56.7168	135.432	±	15.8586	65.932	157.436	±	3.91531	186.211	444.645	±	9.62655	3.27471e-14	±	3.47626e-16	2.38786	72.2108	1.19249	35.211	0.681938	51.5727	±	5.50685
Ap_OP1555-5	31.7215	126.791	±	3.9735	52.9637	211.696	±	5.74713	134.62	538.078	±	11.6131	3.66954e-14	±	4.0096e-16	3.99701	44.1679	1.71276	38.3638	0.718809	53.5358	±	2.89278
Ap_OP1555-6	29.5289	96.7658	±	3.8146	16.7497	54.8884	±	1.71703	132.447	434.027	±	7.69139	1.54988e-15	±	2.27044e-17	3.27699	33.4651	0.581874	2.62261	0.716722	3.67455	±	0.228079
Ap_OP1557-1	29.8084	54.6281	±	9.2208	6.12029	11.2163	±	0.462559	63.7688	116.865	±	5.20227	5.56335e-16	±	1.10563e-17	1.83264	31.2467	0.210622	1.85064	0.629114	2.94204	±	0.510596
Ap_OP1557-2	48.303	397.957	±	23.8669	8.96787	73.884	±	1.45889	252.62	2081.27	±	20.3939	5.43123e-14	±	6.33858e-16	8.23875	50.4105	0.190452	24.2619	0.786586	30.9165	±	2.36357
Ap_OP1557-3	48.1865	83.0946	±	10.1822	33.9586	58.5594	±	1.17896	308.429	531.866	±	10.7315	7.4545e-15	±	9.51246e-17	1.72444	56.1668	0.722926	14.3945	0.668	21.6317	±	2.62068
Ap_OP1557-4	60.8841	287.329	±	17.8899	28.239	133.268	±	2.76885	380.298	1794.73	±	22.4005	5.08048e-14	±	6.05883e-16	4.71928	67.5203	0.475791	29.5957	0.771257	38.352	±	2.83541
Ap_OP1557-5	11.3648	18.9578	±	0.927706	37.5717	62.6739	±	1.49784	61.2631	102.194	±	4.84284	2.8571e-16	±	8.58831e-18	1.66812	20.1941	3.39133	1.56455	0.655679	2.38827	±	0.153027
Ap_OP1557-6	26.7489	72.3261	±	3.20058	43.2842	117.036	±	3.87193	108.792	294.163	±	6.44038	3.06757e-15	±	4.54346e-17	2.70389	36.9206	1.65995	5.70033	0.707632	8.05092	±	0.473423
Ap_OP1557-7	60.1179	155.633	±	3.12574	38.8419	100.554	±	2.69421	480.315	1243.44	±	15.9807	3.53923e-14	±	4.89048e-16	2.58879	69.2458	0.662777	36.4802	0.749548	48.4299	±	2.5606
Ap_OP1558-1	6.8318	9.56975	±	0.696308	10.1846	14.2663	±	0.666904	182.57	255.738	±	6.32817	5.13695e-16	±	1.10137e-17	1.40077	9.22518	1.52925	7.36295	0.625858	11.8083	±	0.869098
Ap_OP1558-2	11.4847	9.85607	±	0.7758	10.1397	8.70182	±	0.704745	92.9155	79.7391	±	3.58494	2.88669e-16	±	7.3621e-18	0.858189	13.8676	0.905684	4.50645	0.604956	7.4461	±	0.648879
Ap_OP1558-3	15.6045	31.931	±	1.29666	69.6881	142.601	±	3.03709	275.797	564.355	±	6.96522	5.89313e-15	±	6.57547e-17	2.04627	31.9812	4.5812	16.578	0.663073	24.962	±	1.37462
Ap_OP1558-4	30.6752	56.0654	±	2.15476	8.07004	14.7497	±	0.581377	102.494	187.329	±	4.72426	1.52011e-15	±	2.11916e-17	1.82771	32.5716	0.269873	4.7402	0.676447	7.00705	±	0.430253
Ap_OP1559-1	22.1761	15.8846	±	1.10473	6.18517	4.4304	±	0.437439	224.219	160.607	±	5.48072	8.25385e-16	±	1.49007e-17	0.716294	23.6296	0.286113	9.06002	0.662286	13.7018	±	1.14858
Ap_OP1559-2	49.8812	44.9656	±	1.8127	89.5209	80.6989	±	1.93784	222.7	200.754	±	5.88148	2.04979e-15	±	2.84843e-17	0.901454	70.9186	1.84102	5.92062	0.658586	8.98617	±	0.523277
Ap_OP1559-3	70.6661	43.5012	±	1.90347	153.152	94.2785	±	2.50744	167.276	102.973	±	3.53733	2.28843e-15	±	3.26374e-17	0.615588	106.657	2.22322	6.43603	0.536626	12.008	±	0.692161
Ap_OP1559-4	45.762	56.3402	±	2.58309	37.0264	45.5853	±	1.4034	213.407	262.737	±	8.88608	2.13686e-15	±	3.6277e-17	1.23116	54.4633	0.829997	5.90569	0.635654	9.29959	±	0.563876
Ap_OP1560-1	21.207	58.7758	±	10.3503	17.9369	49.7126	±	1.15989	56.6499	157.007	±	5.45426	1.36664e-15	±	2.20158e-17	2.77153	25.4222	0.867639	3.65652	0.675214	5.42377	±	0.845919
Ap_OP1560-2	57.9833	160.325	±	18.1287	48.6755	134.588	±	2.5022	137.769	380.935	±	6.44368	2.87212e-14	±	3.36106e-16	2.76502	69.422	0.861148	27.9018	0.687944	40.4544	±	4.23458
Ap_OP1560-3	20.7361	34.2517	±	6.50816	2.09014	3.45248	±	0.243057	168.875	278.947	±	9.7308	1.53573e-15	±	2.55053e-17	1.65179	21.2273	0.1034	8.42159	0.666185	12.6554	±	2.65695
Ap_OP1560-4	30.2563	35.8014	±	5.95037	2.08753	2.47012	±	0.21706	69.6452	82.4091	±	6.41503	7.89695e-17	±	6.32549e-18	1.18327	30.7469	0.0707763	0.415691	0.622724	0.665283	±	0.124652
Ap_OP1561-1	11.7946	64.9957	±	2.32868	14.6289	80.6144	±	2.61172	201.731	1111.66	±	13.9929	9.97768e-15	±	1.2488e-16	5.51062	15.2324	1.27233	21.9389	0.78159	28.1496	±	1.65233
Ap_OP1561-2	17.3183	24.6841	±	1.28168	14.5017	20.6697	±	0.78293	192.173	273.908	±	6.5812	3.13467e-15	±	4.97727e-17	1.42532	20.7262	0.858986	19.6634	0.677491	28.9042	±	1.9708
Ap_OP1561-3	12.8937	16.9557	±	0.890119	8.86469	11.6574	±	0.643184	204.484	268.905	±	6.36937	2.45352e-15	±	3.84679e-17	1.31504	14.9769	0.705272	23.1126	0.675306	34.2188	±	2.22307
Ap_OP1561-4	69.6488	16.3918	±	0.648932	221.046	52.0228	±	1.88616	1198.82	282.142	±	7.91649	2.49675e-15	±	3.35836e-17	0.235349	121.595	3.25566	16.0927	0.517505	31.0591	±	1.8163
Ap_OP1562-1	34.5858	61.367	±	9.32085	15.3767	27.2835	±	1.03361	46.5628	82.6182	±	5.40244	1.19872e-15	±	2.1737e-17	1.77434	38.1994	0.456075	3.3093	0.676052	4.90859	±	0.720814
Ap_OP1562-2	62.4785	63.9016	±	8.2377	7.2629	7.42832	±	0.332252	144.136	147.419	±	5.81377	9.88699e-16	±	2.2551e-17	1.02278	64.1853	0.119248	2.84227	0.548242	5.1718	±	0.752572
Ap_OP1562-3	36.3999	45.6744	±	11.755	8.83867	11.0907	±	0.455251	21.3542	26.7951	±	5.18694	4.31026e-16	±	9.95326e-18	1.25479	38.477	0.24909	1.74399	0.58713	2.97543	±	0.83503
Ap_OP1562-4	16.9936	38.8078	±	8.55427	3.93894	8.99526	±	0.521125	60.5393	138.252	±	6.57098	3.31481e-16	±	9.71019e-18	2.28368	17.9192	0.237774	1.56615	0.72464	2.17006	±	0.532754
Ap_OP1571-1	31.2603	122.873	±	13.4582	36.5647	143.722	±	3.32189	103.735	407.742	±	11.4129	1.95273e-15	±	3.20872e-17	3.93062	39.853	1.19988	2.32227	0.761442	3.04713	±	0.288216
Ap_OP1571-2	14.4684	42.5134	±	7.14672	9.11878	26.7943	±	0.976833	321.097	943.501	±	10.2676	9.97719e-15	±	1.3142e-16	2.93836	16.6113	0.646528	38.6492	0.727132	53.0975	±	8.0162
Ap_OP1571-3	18.8458	62.1903	±	9.69672	20.3739	67.233	±	1.78277	82.2067	271.278	±	10.6111	7.34131e-16	±	1.44757e-17	3.29995	23.6337	1.109	1.75703	0.707336	2.48945	±	0.338438
Ap_OP1571-4	44.4588	181.458	±	18.8463	18.6349	76.058	±	1.21485	160.705	655.916	±	12.512	2.91542e-15	±	4.26208e-17	4.08148	48.838	0.429972	2.73724	0.727691	3.74826	±	0.393014
Ap_OP1572-1	55.38	247.865	±	19.4545	46.4741	208.005	±	3.96362	177.978	796.577	±	11.2311	2.47134e-14	±	2.76343e-16	4.47571	66.3014	0.860853	15.4793	0.76654	20.2181	±	1.68916
Ap_OP1572-2	55.2122	89.745	±	14.3234	26.2632	42.6896	±	1.51536	121.492	197.479	±	8.72683	1.0404e-14	±	1.23665e-16	1.62545	61.3841	0.487958	19.5323	0.611978	31.8709	±	5.05676
Ap_OP1572-3	55.7245	127.056	±	12.4224	33.8587	77.2006	±	1.61311	121.795	277.703	±	9.6169	9.64427e-15	±	1.23357e-16	2.28008	63.6813	0.623296	12.3864	0.679105	18.2206	±	1.7734
Ap_OP1572-4	29.6623	70.4966	±	9.95203	18.6461	44.3152	±	1.48961	110.59	262.832	±	10.7979	1.01085e-15	±	1.63414e-17	2.37664	34.0441	0.644844	2.33454	0.716227	3.26588	±	0.432122
Ap_OP1572-5	59.1548	186.718	±	6.74611	55.4404	174.994	±	4.71455	208.893	659.355	±	9.08317	1.85936e-14	±	2.28508e-16	3.15643	72.1833	0.961406	15.107	0.736987	20.507	±	1.16386
Ap_OP1572-6	71.5041	117.455	±	4.31214	56.4406	92.711	±	2.50581	185.193	304.203	±	4.8899	1.17909e-14	±	1.47206e-16	1.64263	84.7676	0.809713	15.681	0.729771	21.4337	±	1.22483
Ap_OP1573-1	82.6719	19.0891	±	1.09333	55.4878	12.8122	±	0.348877	289.91	66.9408	±	3.9473	3.13727e-16	±	9.55001e-18	0.230902	95.7115	0.688509	2.63647	0.702659	3.74695	±	0.28617
Ap_OP1573-2	32.3024	75.1492	±	3.0071	74.8989	174.247	±	4.6207	141.167	328.414	±	7.08777	2.44028e-14	±	3.08477e-16	2.32643	49.9036	2.37854	38.8511	0.68019	56.9088	±	3.21017
Ap_OP1573-3	53.2581	107.252	±	2.61313	10.7079	21.5637	±	1.04596	148.367	298.784	±	5.03969	1.72053e-15	±	2.56748e-17	2.01382	55.7744	0.206247	2.84254	0.689186	4.12192	±	0.234974
Ap_OP1573-4	89.2547	123.129	±	4.97019	146.943	202.711	±	4.49234	191.302	263.905	±	6.87584	2.29159e-15	±	3.25737e-17	1.37952	123.786	1.68884	2.4827	0.636839	3.8846	±	0.225104
Ap_OP1574-1	36.1855	81.9838	±	14.9646	0.784995	1.77852	±	0.18438	292.521	662.752	±	7.22643	1.49448e-15	±	2.24952e-17	2.26565	36.37	0.0222537	3.47542	0.713351	4.85561	±	0.99231
Ap_OP1574-2	86.6841	208.181	±	21.0664	62.993	151.284	±	3.33619	223.389	536.491	±	13.1052	1.60668e-14	±	2.28651e-16	2.4016	101.487	0.745458	12.2778	0.685037	17.9148	±	1.82384
Ap_OP1574-3	57.0797	93.1089	±	12.1143	10.183	16.6106	±	0.973529	95.6108	155.961	±	8.56339	5.69345e-16	±	1.18241e-17	1.63121	59.4727	0.183006	1.11012	0.62794	1.76376	±	0.241688
Ap_OP1574-4	31.5817	44.5072	±	10.7567	17.8817	25.2002	±	0.889385	46.4163	65.4133	±	4.24637	2.71368e-16	±	7.89952e-18	1.40927	35.7839	0.580824	1.04479	0.652341	1.61009	±	0.426115
Ap_OP1574-5	31.9137	46.3698	±	1.42902	34.3717	49.9412	±	2.03538	100.417	145.903	±	4.81512	7.24335e-16	±	1.71845e-17	1.45298	39.991	1.10483	2.30446	0.661858	3.48701	±	0.205831
Ap_OP1574-6	13.1168	40.2894	±	1.67056	11.973	36.7759	±	1.35118	160.399	492.677	±	9.88209	7.32009e-16	±	1.57984e-17	3.07158	15.9305	0.936361	2.77195	0.711524	3.89595	±	0.242357
Ap_OP1574-7	18.9732	25.5686	±	1.26334	7.45759	10.05	±	0.53325	186.506	251.338	±	6.10008	3.85544e-16	±	1.03523e-17	1.34762	20.7257	0.403207	2.56318	0.643656	3.97794	±	0.291578
Ap_OP1576-1	8.64532	40.8545	±	7.58883	5.66337	26.763	±	0.860947	191.567	905.272	±	13.4416	2.86501e-14	±	3.45599e-16	4.72563	9.97621	0.671992	113.972	0.772096	147.295	±	25.6219
Ap_OP1576-3	35.2016	89.5239	±	11.5567	28.6391	72.8344	±	1.42757	149.556	380.346	±	6.58982	5.87566e-16	±	1.37403e-17	2.54318	41.9318	0.83458	1.03309	0.674362	1.52998	±	0.177571
Ap_OP1576-4	15.2555	36.516	±	6.75529	3.63076	8.6907	±	0.45888	156.069	373.573	±	7.75437	4.36054e-14	±	5.7088e-16	2.39363	16.1087	0.244142	211.948	0.718438	291.838	±	56.3508
Ap_OP1528-1	38.5277	110.119	±	3.58171	71.8263	205.293	±	5.0952	72.8931	208.342	±	5.8323	1.54743e-15	±	2.22926e-17	2.85818	55.4069	1.91241	1.80798	0.698143	2.59822	±	0.150631
Ap_OP1528-2	11.5662	14.1605	±	0.742612	18.1426	22.212	±	1.17123	89.5078	109.584	±	4.8358	2.17364e-16	±	8.40737e-18	1.2243	15.8297	1.60908	2.07971	0.631919	3.27055	±	0.248791
Ap_OP1528-3	13.0381	39.2913	±	1.32729	29.9162	90.1544	±	2.04423	75.1156	226.366	±	4.8863	6.44256e-16	±	1.64151e-17	3.01357	20.0684	2.35375	1.9671	0.691784	2.84317	±	0.173053
Ap_OP1528-4	32.976	49.4198	±	2.52459	61.3841	91.9941	±	2.45784	135.967	203.768	±	5.5574	8.29961e-16	±	1.27263e-17	1.49866	47.4012	1.90954	2.16376	0.64818	3.33329	±	0.207681
Ap_OP1556-1	16.9772	12.692	±	0.893437	10.338	7.72863	±	0.532787	75.282	56.2801	±	3.79374	1.04124e-16	±	5.49065e-18	0.747591	19.4066	0.624658	1.33763	0.633288	2.10849	±	0.198084
Ap_OP1556-2	29.1115	57.7286	±	1.82766	11.7721	23.3442	±	0.814469	148.753	294.98	±	6.19594	9.72814e-16	±	1.59649e-17	1.98302	31.8779	0.414818	2.85182	0.677013	4.23318	±	0.241133
Ap_OP1556-3	5.65014	13.3916	±	0.757668	14.765	34.9951	±	1.24151	134.852	319.619	±	6.89076	2.83983e-16	±	7.76312e-18	2.37014	9.11991	2.68067	2.4267	0.690364	3.51952	±	0.236154
