# Supplementary material for: How steady are steady-state mountain belts? – a re-examination of the Olympic Mountains (Washington State, USA)
Source: Copernicus journal article supplement (doi:10.5194/esurf-2018-65), 2018-09-03
Supplement: Supplementary file 1 [file esurf-2018-65-supplement.zip › table_S2_zircons_He.xlsx]

## Sheet: Sheet1
Table DR2: Zircon (U-Th)/He data
Note: Aliquots which are strike-through are not considered for the sample age calculation. ppm values of U and Th are calculated from iCAP results by deviding the mass of the respective element by the grain mass (which is derived from measurements of 91Zr). eU is calculated by adding U-content and 0.235*Th-content.
Sample/ Aliquot	U (ppm)	U ± 2SD (pg)			Th (ppm)	Th ± 2SD (pg)			He ± 1SD (mol)			grain mass (µg)	eU (ppm)	Th/U	Uncorrected grain age (Ma)	FT correction	Corrected grain age ± 1SD (Ma)
Zr_OP1550-1	282.638	1955.93	±	49.2947	52.6046	364.037	±	9.36353	7.37e-14	±	9.07e-16	6.92025	295	0.190925	6.69592	0.81575	8.24217	±	0.44481
Zr_OP1550-2	420.806	1982.17	±	33.721	97.5475	459.49	±	12.7908	5.27e-14	±	6.43e-16	4.71042	443.73	0.237796	4.6784	0.755178	6.18104	±	0.338391
Zr_OP1550-3	864.783	1449.47	±	32.876	86.2191	144.512	±	4.21079	7.16e-14	±	8.34e-16	1.67611	885.044	0.102274	8.95529	0.735058	12.154	±	0.651226
Zr_OP1550-4	627.504	3753.85	±	55.0456	148.233	886.755	±	17.4792	1.15e-13	±	1.37e-15	5.98219	662.338	0.242325	5.40369	0.804248	6.70802	±	0.341108
Zr_OP1551-2	628.309	3891.72	±	75.404	75.7208	469.012	±	12.5075	3.72715e-13	±	2.387e-15	6.19396	646.104	0.123627	17.261	0.825517	20.9231	±	1.11898
Zr_OP1551-3	340.937	2429.29	±	47.8718	106.158	756.415	±	18.9342	1.16096e-13	±	1.45124e-15	7.12534	365.884	0.319412	8.24829	0.829823	9.97334	±	0.544206
Zr_OP1551-4	730.338	5134.26	±	123.446	289.359	2034.19	±	53.6121	1.65781e-13	±	2.17647e-15	7.02998	798.338	0.406428	5.4746	0.801561	6.82658	±	0.381525
Zr_OP1551-5	164.084	774.015	±	17.9549	50.622	238.793	±	7.35312	2.33575e-14	±	3.02893e-16	4.71719	175.98	0.316478	5.216	0.769416	6.80675	±	0.367813
Zr_OP1551-6	259.383	2145.18	±	37.4423	144.497	1195.04	±	30.0276	7.42447e-14	±	9.29841e-16	8.27034	293.34	0.571464	5.66546	0.795358	7.12144	±	0.37426
Zr_OP1551-7	175.578	537.84	±	12.6742	67.1155	205.592	±	9.02105	1.75259e-14	±	2.09564e-16	3.06325	191.35	0.392124	5.54849	0.74891	7.41917	±	0.41413
Zr_OP1552-1	347.329	728.714	±	20.738	122.404	256.809	±	8.72798	3.14483e-14	±	3.42003e-16	2.09805	376.094	0.361513	7.38494	0.681447	10.8462	±	0.618143
Zr_OP1552-2	413.279	2298.68	±	42.4085	77.4184	430.605	±	11.9061	9.17805e-14	±	1.05183e-15	5.56205	431.473	0.192164	7.08729	0.789541	8.98843	±	0.490837
Zr_OP1552-3	117.153	322.968	±	6.51375	39.0415	107.63	±	4.79924	9.18453e-15	±	1.16137e-16	2.75681	126.327	0.341857	4.89585	0.738795	6.60944	±	0.361588
Zr_OP1552-4	516.575	855.177	±	25.6042	152.507	252.471	±	9.01443	2.68139e-14	±	3.18291e-16	1.65548	552.414	0.302849	5.44305	0.698583	7.79336	±	0.448079
Zr_OP1553-1	247.763	1927.16	±	38.3656	43.4849	338.236	±	9.62307	6.95e-14	±	8.91e-16	7.77826	257.982	0.180041	6.41931	0.803969	7.9807	±	0.453132
Zr_OP1553-2	552.763	6195.53	±	130.176	135.963	1523.91	±	34.2778	2.27e-13	±	2.87e-15	11.2083	584.714	0.25232	6.43037	0.836087	7.67509	±	0.422361
Zr_OP1553-3	172.567	2082.42	±	30.0148	70.5191	850.974	±	22.4588	7.63e-14	±	9.95e-16	12.0673	189.139	0.419197	6.19227	0.848258	7.32338	±	0.39791
Zr_OP1554-1	112.634	355.643	±	7.4373	26.2505	82.8857	±	3.24407	1.17e-14	±	1.7e-16	3.15749	118.803	0.239076	5.78148	0.748427	7.74742	±	0.424033
Zr_OP1554-2	433.085	1348.28	±	34.3597	147.326	458.656	±	26.2958	3.9e-14	±	4.74e-16	3.1132	467.707	0.348961	4.96989	0.746184	6.64104	±	0.382095
Zr_OP1554-3	362.598	754.145	±	10.5737	62.6911	130.387	±	5.00035	1.93e-14	±	2.42e-16	2.07984	377.33	0.177358	4.56722	0.70121	6.52887	±	0.35203
Zr_OP1554-4	640.043	789.199	±	19.0647	256.085	315.764	±	12.4575	2.33e-14	±	3.07e-16	1.23304	700.223	0.410436	5.00699	0.662071	7.5639	±	0.426472
Zr_OP1555-1	196.597	1440.12	±	34.7423	91.8802	673.044	±	18.4667	5.68424e-14	±	7.1693e-16	7.32523	218.189	0.479419	6.58855	0.81045	8.1178	±	0.448335
Zr_OP1555-2	251.776	1977.73	±	44.7415	103.005	809.119	±	21.1543	7.70848e-14	±	9.57501e-16	7.85513	275.982	0.419677	6.59616	0.805268	8.17577	±	0.430647
Zr_OP1555-3	309.026	1575.36	±	38.4602	79.1593	403.54	±	11.7125	3.77736e-14	±	4.5738e-16	5.09782	327.629	0.26277	4.19495	0.822322	5.08679	±	0.28915
Zr_OP1555-4	190.148	877.215	±	25.8937	100.756	464.818	±	9.02569	3.09706e-14	±	4.02424e-16	4.61332	213.826	0.543559	5.82663	0.79308	7.33406	±	0.435999
Zr_OP1557-1	333.73	2568.28	±	64.5124	102.942	792.212	±	15.067	5.97099e-13	±	7.2901e-15	7.69568	357.922	0.316424	40.1312	0.753326	53.0886	±	3.00615
Zr_OP1557-2	653.093	4708.83	±	74.3089	175.669	1266.58	±	34.4401	1.02411e-12	±	1.16141e-14	7.21004	694.375	0.275925	37.8429	0.801497	47.1175	±	2.46491
Zr_OP1557-3	235.576	1901.87	±	42.2789	94.5416	763.259	±	20.8188	2.08029e-13	±	2.52575e-15	8.07327	257.793	0.411683	18.5223	0.737227	25.0734	±	1.36564
Zr_OP1557-4	189.39	1225.34	±	30.4804	76.2497	493.329	±	13.6432	1.13168e-13	±	1.39902e-15	6.46992	207.308	0.413002	15.649	0.781698	20.0595	±	1.1256
Zr_OP1562-1	355.548	1205.12	±	30.6367	141.372	479.175	±	11.9255	1.46011e-13	±	1.75119e-15	3.38946	388.77	0.407883	20.5385	0.80225	25.5475	±	1.44903
Zr_OP1562-2	369.428	1959.78	±	42.3953	39.3237	208.609	±	7.91582	2.82292e-13	±	3.44803e-15	5.30492	378.669	0.109193	26.0382	0.80606	32.2714	±	1.75259
Zr_OP1562-3	236.84	869.437	±	24.4235	57.167	209.86	±	7.46175	1.01966e-13	±	1.28296e-15	3.67099	250.274	0.247606	20.5664	0.809055	25.4083	±	1.42086
Zr_OP1562-4	189.939	962.371	±	24.7425	142.252	720.75	±	16.1559	1.58259e-13	±	1.96284e-15	5.06673	223.368	0.768267	25.9128	0.769683	33.5532	±	1.84124
Zr_OP1570-1	345.236	2886.94	±	89.4221	102.537	857.435	±	16.372	1.14748e-13	±	1.4847e-15	8.36223	369.332	0.304673	6.89794	0.820761	8.38756	±	0.484291
Zr_OP1570-2	573.698	3152.87	±	44.1273	192.297	1056.81	±	27.6131	1.4151e-13	±	1.88845e-15	5.4957	618.887	0.343843	7.71233	0.784577	9.83993	±	0.507821
Zr_OP1570-3	466.046	2264.06	±	50.2634	32.6054	158.397	±	4.80601	7.35793e-14	±	9.24788e-16	4.85801	473.709	0.071768	5.93212	0.76437	7.74353	±	0.42645
Zr_OP1570-4	160.182	1158.42	±	32.8752	28.9281	209.204	±	7.14567	3.70456e-14	±	4.7897e-16	7.23187	166.98	0.185258	5.6955	0.823356	6.89433	±	0.388168
Zr_OP1571-1	548.39	2882.98	±	70.8552	47.1618	247.938	±	7.17984	8.68e-14	±	1.06e-15	5.25718	559.473	0.0882209	5.48265	0.768995	7.14428	±	0.396261
Zr_OP1571-2	139.394	2304.49	±	47.1048	33.2904	550.364	±	15.842	1.09e-13	±	1.33e-15	16.5322	147.217	0.244988	8.34556	0.860137	9.69974	±	0.532349
Zr_OP1571-3	519.056	1215.31	±	28.7108	161.002	376.968	±	13.6947	4.19e-14	±	5.34e-16	2.34138	556.892	0.318191	5.9701	0.722344	8.25296	±	0.455492
Zr_OP1571-4	420.373	3548.76	±	62.4775	97.4516	822.68	±	15.9896	1.26e-13	±	1.69e-15	8.44194	443.274	0.237807	6.27108	0.82434	7.61635	±	0.411286
Zr_OP1572-1	434.941	674.649	±	17.7857	114.184	177.114	±	7.79418	2.30867e-14	±	2.66051e-16	1.55113	461.774	0.269305	5.98343	0.67169	8.91689	±	0.499637
Zr_OP1572-2	1001.6	4173.16	±	61.1322	254.981	1062.38	±	26.1162	1.12416e-13	±	1.33762e-15	4.16649	1061.52	0.261146	4.7113	0.76772	6.13421	±	0.32511
Zr_OP1572-3	258.011	1378.84	±	34.3393	35.1023	187.591	±	7.02546	4.65925e-14	±	5.31747e-16	5.34412	266.26	0.139562	6.07443	0.784444	7.71882	±	0.441632
Zr_OP1572-4	681.725	2496.61	±	42.5172	186.828	684.199	±	16.3172	1.12134e-13	±	1.17378e-15	3.66219	725.629	0.281127	7.82756	0.757298	10.3086	±	0.546797
Zr_OP1572-5	217.022	1863.63	±	29.722	92.3936	793.414	±	14.0994	8.088e-14	±	8.63848e-16	8.58732	238.734	0.436726	7.30893	0.809615	9.05517	±	0.451243
Zr_OP1573-1	286.374	745.745	±	17.9973	129.419	337.02	±	10.553	2.46365e-14	±	2.73824e-16	2.6041	316.787	0.463592	5.54022	0.734431	7.5655	±	0.404373
Zr_OP1573-2	88.8998	308.032	±	9.14552	28.5725	99.0018	±	3.99444	1.25399e-14	±	1.34655e-16	3.46494	95.6143	0.329699	7.02886	0.751769	9.3323	±	0.525187
Zr_OP1573-3	408.858	1664.93	±	35.0773	121.979	496.717	±	10.3052	7.05147e-14	±	8.25142e-16	4.07214	437.523	0.306044	7.33434	0.754589	9.67509	±	0.520382
Zr_OP1573-4	275.724	2324.74	±	54.0379	50.398	424.926	±	6.31768	9.48208e-14	±	1.06891e-15	8.43141	287.567	0.187504	7.25883	0.800793	9.07258	±	0.506735
Zr_OP1574-1	232.003	669.352	±	10.568	43.9975	126.937	±	5.38125	2.15e-14	±	2.85e-16	2.8851	242.342	0.194538	5.70553	0.742323	7.68196	±	0.410698
Zr_OP1574-2	69.4459	622.882	±	18.1611	34.412	308.652	±	8.03236	2.84e-14	±	3.81e-16	8.96931	77.5328	0.508316	7.56119	0.823383	9.20662	±	0.540322
Zr_OP1574-3	1124.06	6696.76	±	117.254	66.0934	393.761	±	7.40908	1.88e-13	±	2.6e-15	5.95764	1139.59	0.0603168	5.13964	0.774816	6.63154	±	0.364587
Zr_OP1574-4	698.269	3204.97	±	55.4858	215.195	987.719	±	23.0789	1.1e-13	±	1.45e-15	4.58987	748.84	0.316141	5.96597	0.75906	7.86631	±	0.424817
Zr_OP1576-1	160.608	396.439	±	6.94788	42.6426	105.257	±	2.62743	1.13e-14	±	1.53e-16	2.46836	170.629	0.272361	4.96713	0.73255	6.79522	±	0.360787
Zr_OP1576-2	193.931	398.699	±	9.92435	87.4295	179.745	±	7.06654	1.59e-14	±	1.93e-16	2.05588	214.477	0.462469	6.6788	0.691426	9.68439	±	0.521798
Zr_OP1576-3	128.687	212.354	±	8.7305	25.9465	42.8158	±	2.70678	5.27e-15	±	7.11e-17	1.65016	134.785	0.20683	4.39628	0.724761	6.0764	±	0.406703
Zr_OP1576-4	212.982	586.545	±	14.4592	56.0789	154.44	±	5.88217	1.62891e-14	±	2.18458e-16	2.75397	226.16	0.270102	4.85989	0.733716	6.64763	±	0.364617
Zr_OP1576-5	368.568	1186.47	±	31.0078	89.3789	287.722	±	9.46467	3.29827e-14	±	4.26417e-16	3.21913	389.572	0.248764	4.88271	0.759685	6.42206	±	0.369983
Zr_OP1577-1	341.449	3594.89	±	64.7854	144.661	1523.04	±	36.8613	1.31718e-13	±	1.66174e-15	10.5283	375.444	0.434606	6.17066	0.834291	7.38908	±	0.405444
Zr_OP1577-2	776.814	3966.05	±	78.2132	130.739	667.495	±	16.8533	1.21373e-13	±	1.50646e-15	5.10554	807.537	0.172647	5.45968	0.754847	7.21792	±	0.382866
Zr_OP1577-3	1264.64	4039.02	±	82.2335	393.586	1257.04	±	35.9747	1.34912e-13	±	1.583e-15	3.19381	1357.13	0.319259	5.77365	0.75167	7.67881	±	0.425956
Zr_OP1577-4	131.761	351.186	±	10.5794	34.639	92.3243	±	3.91142	8.34799e-15	±	1.05949e-16	2.66532	139.901	0.26968	4.15991	0.736183	5.63439	±	0.325638
